# Supplementary material for: Role of air-soil temperature on the LAI course and role of height-DBH on the maximum LAI during foliation of Platanus orientalis L. along an urban-rural greenway system
Source: Copernicus journal article supplement (doi:10.5194/egusphere-2024-3372), 2024-11-29
Supplement: Supplementary file [file egusphere-2024-3372-AC2-supplement.pdf]

Comment:

Greenways are important issues for the landscape architecture. They are also valuable for the other ecological sciences. Analysis of these greenways contribute much to the landscape architecture studies. So they indicate also role of the landscape trees for the ecology and the society. Thus this study evaluates urban-rural greenways focusing on their some tree parameters.

Following reviews must be done to make this study more complete for the scientific literature.

Answer:

Thanks for these positive evaluations on our study. And necessary revisions were done as follows:

Comment: Abstract

Well-written but some long sentences must be shortened such as line 10 and 23.

Also check the other sentences to shorten if necessary.

Answer:

It (line 10) was divided and rewritten as: "Therefore, particularly during their foliation periods, monitoring and analyses of that phenological and eco-physiological course of these roadside trees primarily will indicate their gradual degree of closure, and will determine their gradual coverage on the road and the roadside. Hence, LAI is a significant and comprehensive canopy parameter which is referred for those monitoring and analyses procedures."

It (line 23) was divided and rewritten as: "The point-based maximum LAI values (average 2.76 m<sup>2</sup> m<sup>-2</sup>; ranging between 2.42 m<sup>2</sup> m<sup>-2</sup> and 3.16 m<sup>2</sup> m<sup>-2</sup>) were achieved during the mid-June. They were examined comparing their ranking order with those of the basic physiological parameters; mean height (ranging between 17.0 m and 26.7 m) and mean DBH (ranging between 26.5 cm and 38.2 cm), and number of trees (5 to 15) within the canopy frames of the relevant points."

Comment: Introduction

Prepared with details but line 48 is also long.

Answer:

The sentence changed as: "Therefore, continuous monitoring on the purpose of determining both their phenological course and physiological characteristics through the analyses of certain vegetation parameters, will help to define the degree of their canopy closure and relevant coverage (Granero-Belinchon, 2020; Pu, 2021) on the road and roadsides of those rural greenway systems as well (Wang et al., 2019)."

Yet, it was not shortened to sustain the continuity of the sentence.

Comment: Introduction

Reference studies are not recent all as line 65. Write relatively recent for them.

Answer:

Although there are more recent studies which investigate the relation between the LAI and tree heights and/or canopy heights, studies that have found high and significant positive correlations between them are very scarce. Therefore, the provided references are the most recent ones among those parameters.

Comment: Introduction

What is max LAI date in line 75? Write explicit.

Answer:

According to this suggestion, the sentence was changed as: "Thus, in this study, LAI course of the oriental plane (*Platanus orientalis* L.) trees was monitored and analysed principally throughout the foliation seasons particularly referring to the daily-based relevant temperature data and referring to their physiological parameters during solely the dates when the maximum LAI values were achieved."

Comment: Site Characteristics and Points:

UNESCO 1994 is not in the references. References: Add UNESCO 1994 here.

Answer: The following reference was included into the References section as web site of UNESCO:

UNESCO: World Heritage Convention Web Site. City of Safranbolu, <https://whc.unesco.org/en/list/614/>. 1994

Comment: Material and Methodology

The sentence in line 103 is not a complete sentence. There is not a verb. Therefore greenway system....

Answer:

According to the suggestion, we changed the following sentence as: "Therefore, the greenway system along this intercity road, which is famous primarily from the point of spectacular tree canopy tunnels, are quite dense in some places."

Comment: Material and Methodology

Monitoring studies for which purposes? Write explicit in line 104.

Answer:

To be explicit, the sentence was changed as “In order to secure the sustainability of this greenway system, road construction and repair works are carried out very sensitively, and hence environmental and ecological monitoring studies are encouraged.”

Comment: Material and Methodology

You can also refer to the figures for agricultural areas and villages.... Line 116.

Answers:

According to the suggestion, we changed the following sentence as: “On the other hand, some agricultural fields, which are principally at the foot of the hills and at the lowlands close to the stream, include few village houses (Figs. 1 and 2).”

Comment: Hemispherical Photographing and LAI, Height, DBH Analyses

In line 159, during foliation or during fully-foliated when describing hemispherical photographing?

Answer:

According to the suggestion, we changed the following sentence as: “Thereby, the height and DBH of each of these plane trees within those frames, were measured and recorded according to their points, when they were fully-foliated.”

Comment: Results

Long sentences must be shortened. Because results must be clear.

Answer:

We changed and divided the following sentences as: “During only the six days at the beginning of the second half of April (DOY: 104 to 110), the mean air and soil temperatures climbed from 9.7°C to 13.7°C, and from 11.0°C to 13.2°C respectively (Fig. 4). These temperatures principally triggered the leaf budburst and the directly associated mean LAI climb from 0.44 m<sup>2</sup> m<sup>-2</sup> (ranging between 0.36 m<sup>2</sup> m<sup>-2</sup> for 1. Point and 0.49 m<sup>2</sup> m<sup>-2</sup> for 5. Point) to 0.80 m<sup>2</sup> m<sup>-2</sup> (ranging between 0.72 m<sup>2</sup> m<sup>-2</sup> for 3. Point and 0.92 m<sup>2</sup> m<sup>-2</sup> for 1. Point) (Fig. 3).”

We changed and divided the following sentences as: “Although during the following three weeks until the 12th of May (DOY: 110 to 132), the mean air temperatures dropped from 13.7°C to 11.3°C and then to 10.7°C, and then fluctuated slightly at 11.5°C, it did not do much to affect the soil (-10 cm) temperatures (~12.8°C) (Fig. 4) and the increasing trend of the mean LAI from 0.80 m<sup>2</sup> m<sup>-2</sup> (0.72 m<sup>2</sup> m<sup>-2</sup> for 3. Point-0.92 m<sup>2</sup> m<sup>-2</sup> for 1. Point) to 1.36 m<sup>2</sup> m<sup>-2</sup> (1.07 m<sup>2</sup> m<sup>-2</sup> for 3. Point-1.51 m<sup>2</sup> m<sup>-2</sup> for 1. Point) to 1.83 m<sup>2</sup> m<sup>-2</sup> (1.58 m<sup>2</sup> m<sup>-2</sup> for 3. Point-2.28 m<sup>2</sup> m<sup>-2</sup> for 4. Point) to 2.15 m<sup>2</sup> m<sup>-2</sup> (1.81 m<sup>2</sup> m<sup>-2</sup> for 3. Point-2.50 m<sup>2</sup> m<sup>-2</sup> for 6. Point). This situation indicated the period of the occurrence, flushing and, to some extent expansion of the oriental plane leaves (Fig. 3).”

#### Comment: Results

In line 197, approximated to have lasted? Is it approximately to have....?

According to the suggestion, we changed the sentence as: “During the stationary period principally beginning in early June (DOY: 153) and approximately to have lasted at least until late-July (DOY: 209), the maximum value; 2.76 m<sup>2</sup> m<sup>-2</sup> of the mean LAI (ranging between 2.41 m<sup>2</sup> m<sup>-2</sup> for 3. Point and 3.16 m<sup>2</sup> m<sup>-2</sup> for 4. Point) was achieved (DOY: 158-167), and then it gradually diminished to 2.54 m<sup>2</sup> m<sup>-2</sup> (ranging between 2.20 m<sup>2</sup> m<sup>-2</sup> for 3. Point and 2.84 m<sup>2</sup> m<sup>-2</sup> for 4. Point) (Fig. 3).”

#### Comment: Discussion

Well-discussed and referenced but correct some sentences when passing between referenced studies and your study.

Answer:

We changed and divided the following sentences as: “During these six days, the mean air and soil temperatures (-10 cm) suddenly increased by 4.0°C and by 2.4°C respectively (Fig. 4). Then, until the mid-May (DOY: 110 to 138), this led to the onset of the flushing of fresh leaves, and associated increment of the mean LAI approximately 3 times (from 0.80 m<sup>2</sup> m<sup>-2</sup> to 2.39 m<sup>2</sup> m<sup>-2</sup>) (Fig. 3).”
